# Supplementary material for: Analyzing the large and complex SFARI autism cohort data using the Genotypes and Phenotypes in Families (GPF) platform
Source: HighWire-hosted journal article supplement (doi:10.1101/gr.280356.124), 2025-09-16
Supplement: Supplemental_Code.zip [file example_02_prb_column.pdf › gpf-master/docs/administration/working_with_pedigree_files/example_02_prb_column.pdf]

f1

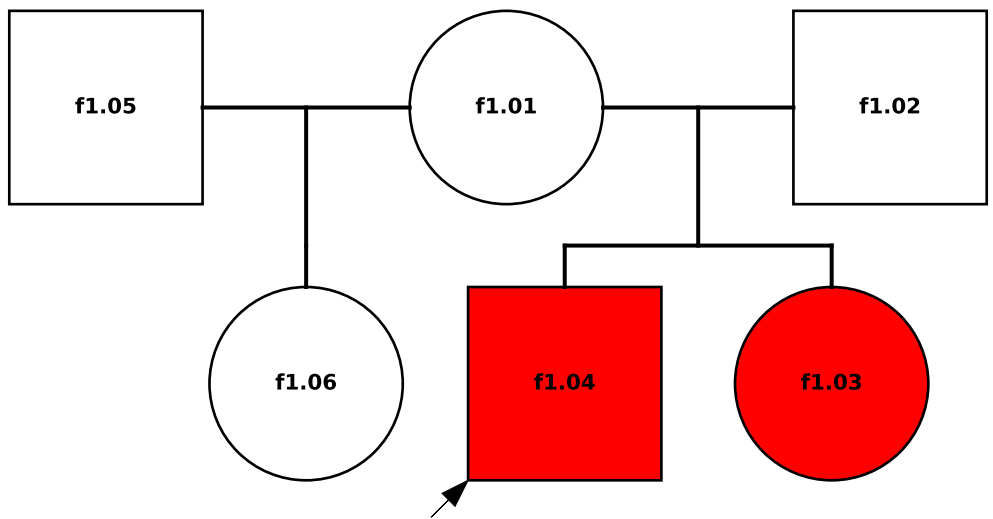

| familyid | individualid | father | mother | sex | status     | role                  | layout | generated | not_sequenced |
|----------|--------------|--------|--------|-----|------------|-----------------------|--------|-----------|---------------|
| f1       | f1.05        |        |        | M   | unaffected | step_dad              |        |           |               |
| f1       | f1.01        |        |        | F   | unaffected | mom                   |        |           |               |
| f1       | f1.02        |        |        | M   | unaffected | dad                   |        |           |               |
| f1       | f1.06        | f1.05  | f1.01  | F   | unaffected | maternal_half_sibling |        |           |               |
| f1       | f1.04        | f1.02  | f1.01  | M   | affected   | prb                   |        |           |               |
| f1       | f1.03        | f1.02  | f1.01  | F   | affected   | sib                   |        |           |               |
