# Supplementary material for: Analyzing the large and complex SFARI autism cohort data using the Genotypes and Phenotypes in Families (GPF) platform
Source: HighWire-hosted journal article supplement (doi:10.1101/gr.280356.124), 2025-09-16
Supplement: Supplemental_Code.zip [file example_families.pdf › gpf-master/docs/administration/working_with_pedigree_files/example_families.pdf]

f1

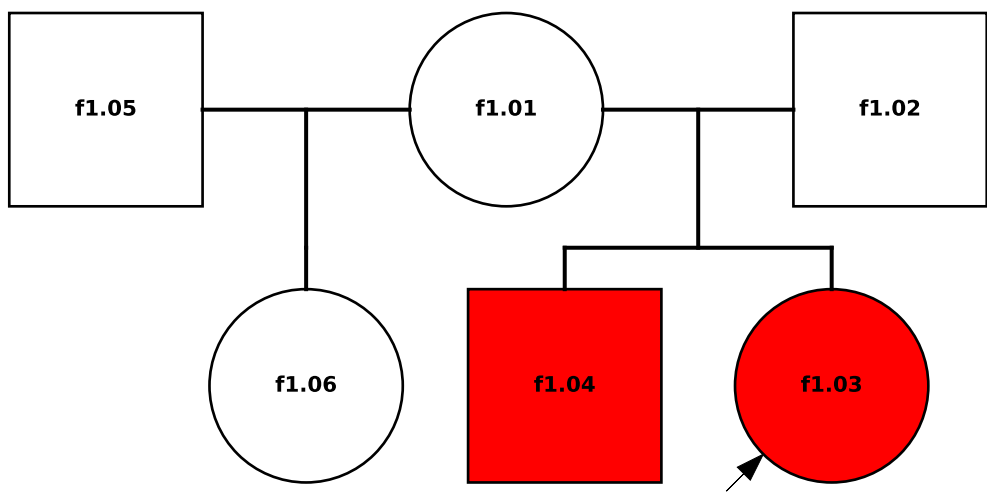

| familyid | individualid | father | mother | sex | status     | role                  | layout | generated | not_sequenced |
|----------|--------------|--------|--------|-----|------------|-----------------------|--------|-----------|---------------|
| f1       | f1.05        |        |        | M   | unaffected | step_dad              |        |           |               |
| f1       | f1.01        |        |        | F   | unaffected | mom                   |        |           |               |
| f1       | f1.02        |        |        | M   | unaffected | dad                   |        |           |               |
| f1       | f1.06        | f1.05  | f1.01  | F   | unaffected | maternal_half_sibling |        |           |               |
| f1       | f1.04        | f1.02  | f1.01  | M   | affected   | sib                   |        |           |               |
| f1       | f1.03        | f1.02  | f1.01  | F   | affected   | prb                   |        |           |               |

f2

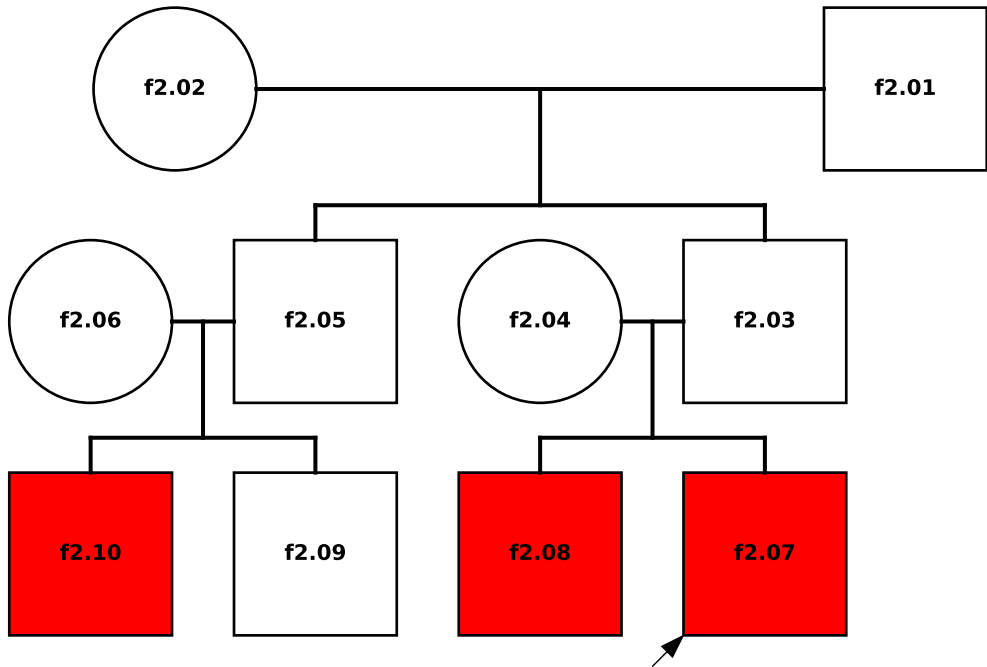

| familyid | individual | father | mother | sex | status     | role                 | layout | generated | noc sequenced |
|----------|------------|--------|--------|-----|------------|----------------------|--------|-----------|---------------|
| f2       | f2.01      |        |        | M   | unaffected | paternal_grandmother |        |           |               |
| f2       | f2.02      |        |        | F   | unaffected | paternal_grandfather |        |           |               |
| f2       | f2.03      |        |        | M   | unaffected | unknown              |        |           |               |
| f2       | f2.04      |        |        | F   | unaffected | unknown              |        |           |               |
| f2       | f2.05      | f2.01  | f2.02  | M   | unaffected | paternal_uncle       |        |           |               |
| f2       | f2.06      |        |        | F   | unaffected | non                  |        |           |               |
| f2       | f2.07      | f2.01  | f2.02  | M   | unaffected | dad                  |        |           |               |
| f2       | f2.08      | f2.05  | f2.06  | M   | affected   | paternal_cousin      |        |           |               |
| f2       | f2.09      | f2.05  | f2.06  | M   | unaffected | paternal_cousin      |        |           |               |
| f2       | f2.10      | f2.03  | f2.04  | M   | affected   | ab                   |        |           |               |
| f2       | f2.01      | f2.03  | f2.04  | M   | affected   | pb                   |        |           |               |

f3

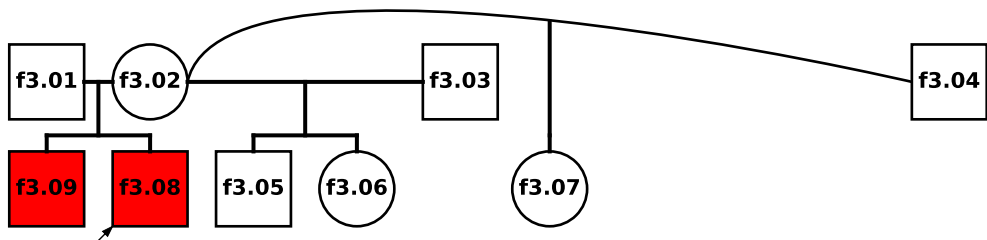

| familyid | individualid | father | mother | sex | status     | role                  | layout | generated | not_sequenced |
|----------|--------------|--------|--------|-----|------------|-----------------------|--------|-----------|---------------|
| f3       | f3.01        |        |        | M   | unaffected | dad                   |        |           |               |
| f3       | f3.02        |        |        | F   | unaffected | mom                   |        |           |               |
| f3       | f3.03        |        |        | M   | unaffected | step_dad              |        |           |               |
| f3       | f3.04        |        |        | M   | unaffected | step_dad              |        |           |               |
| f3       | f3.09        | f3.01  | f3.02  | M   | affected   | sib                   |        |           |               |
| f3       | f3.08        | f3.01  | f3.02  | M   | affected   | prb                   |        |           |               |
| f3       | f3.05        | f3.03  | f3.02  | M   | unaffected | maternal_half_sibling |        |           |               |
| f3       | f3.06        | f3.03  | f3.02  | F   | unaffected | maternal_half_sibling |        |           |               |
| f3       | f3.07        | f3.04  | f3.02  | F   | unaffected | maternal_half_sibling |        |           |               |

f4

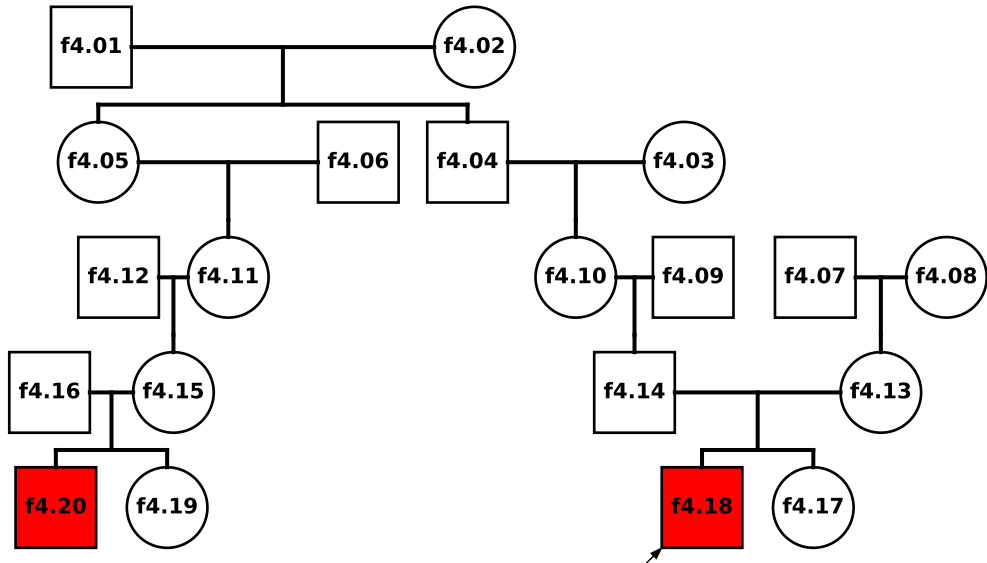

| familyid | individual | father | mother | sex | status     | role                 | byte4 | generated | not_sequenced |
|----------|------------|--------|--------|-----|------------|----------------------|-------|-----------|---------------|
| fa       | fa.01      |        |        | M   | unaffected | unknown              |       |           |               |
|          | fa.02      |        |        | F   | unaffected | unknown              |       |           |               |
| fa       | fa.03      | fa.01  | fa.02  | F   | unaffected | unknown              |       |           |               |
| fa       | fa.06      |        |        | M   | unaffected | unknown              |       |           |               |
| fa       | fa.04      | fa.01  | fa.02  | M   | unaffected | unknown              |       |           |               |
| fa       | fa.03      |        |        | F   | unaffected | unknown              |       |           |               |
| fa       | fa.12      |        |        | M   | unaffected | unknown              |       |           |               |
| fa       | fa.11      | fa.06  | fa.05  | F   | unaffected | unknown              |       |           |               |
| fa       | fa.10      | fa.04  | fa.03  | F   | unaffected | paternal_grandmother |       |           |               |
| fa       | fa.09      |        |        | M   | unaffected | paternal_grandfather |       |           |               |
| fa       | fa.07      |        |        | M   | unaffected | maternal_grandfather |       |           |               |
| fa       | fa.08      |        |        | F   | unaffected | maternal_grandmother |       |           |               |
| fa       | fa.16      |        |        | M   | unaffected | unknown              |       |           |               |
| fa       | fa.15      | fa.12  | fa.11  | F   | unaffected | unknown              |       |           |               |
| fa       | fa.14      | fa.09  | fa.10  | M   | unaffected | dad                  |       |           |               |
| fa       | fa.13      | fa.07  | fa.08  | F   | unaffected | mom                  |       |           |               |
| fa       | fa.20      | fa.16  | fa.15  | M   | affected   | unknown              |       |           |               |
| fa       | fa.19      | fa.16  | fa.15  | F   | unaffected | unknown              |       |           |               |
| fa       | fa.18      | fa.14  | fa.13  | M   | affected   | prb                  |       |           |               |
| fa       | fa.17      | fa.14  | fa.13  | F   | unaffected | sib                  |       |           |               |
